# Supplementary material for: Re-entrant supramolecular interactions in inverse-melting α-cyclodextrin·4-methylpyridine·water mixtures: an NMR study
Source: Royal Society of Chemistry journal article supplement (doi:10.1039/c8cp04328k), 2018-01-01
Supplement: c8cp04328k1.pdf [file c8cp04328k1.pdf]

## Supporting information

### **Re-entrant supramolecular interactions in inverse melting $\alpha$ -cyclodextrin·4-methylpyridine·water mixtures: an NMR study**

Reut Shapira, Yael S. Balazs, Shifi Kababya, Rachel Edrei and Yoav Eichen\*a

*Schulich Faculty of Chemistry, Technion – Israel Institute of Technology, Technion City 3200008 Haifa  
Israel. E-mail: yoav@ch.technion.ac.il*

## Supporting Figures and tables

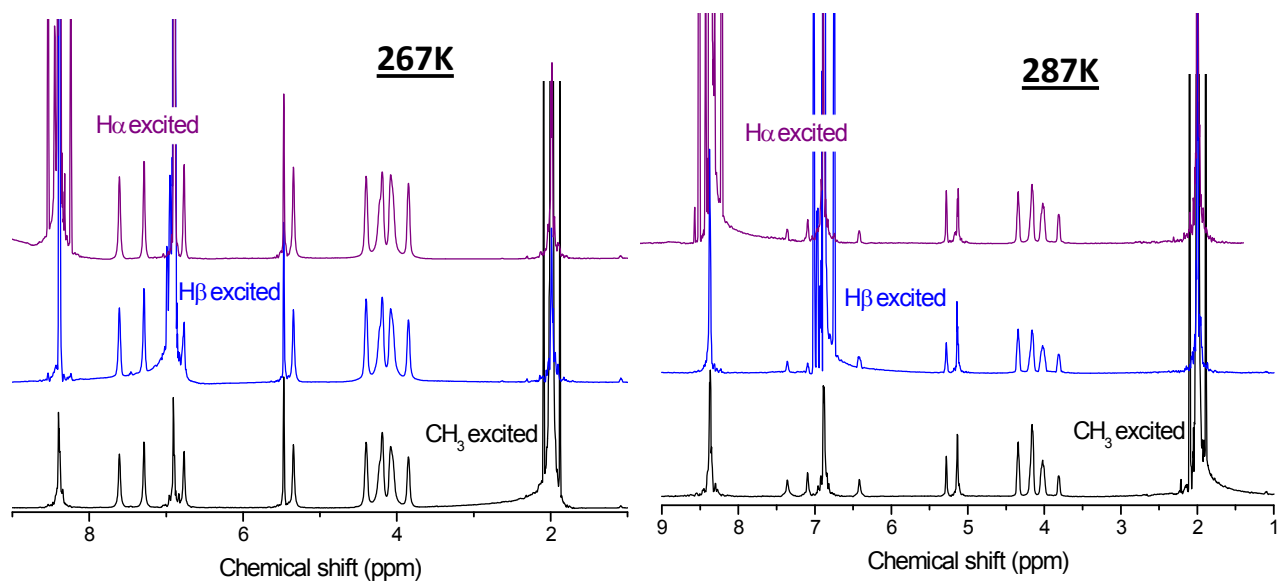

**Figure S1:** 1D-NOE spectra of  $\alpha$ CD-4MP- $H_2O$  mixture at 267K and 287K (projected from 2D-NOESY, excited protons are signed).

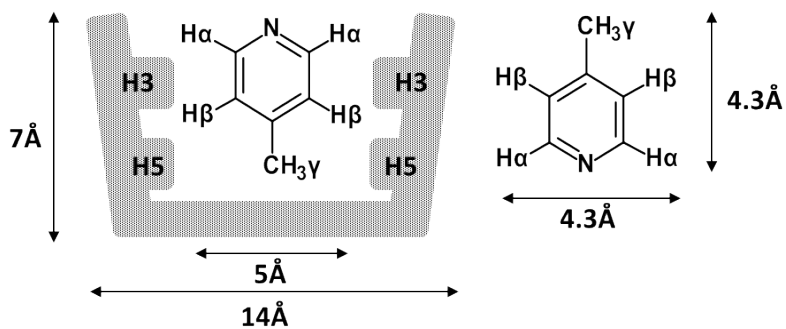

**Figure S2:** Two possible orientations for  $\alpha$ CD-4MP host-guest complex; dimensions from literature<sup>1</sup>.

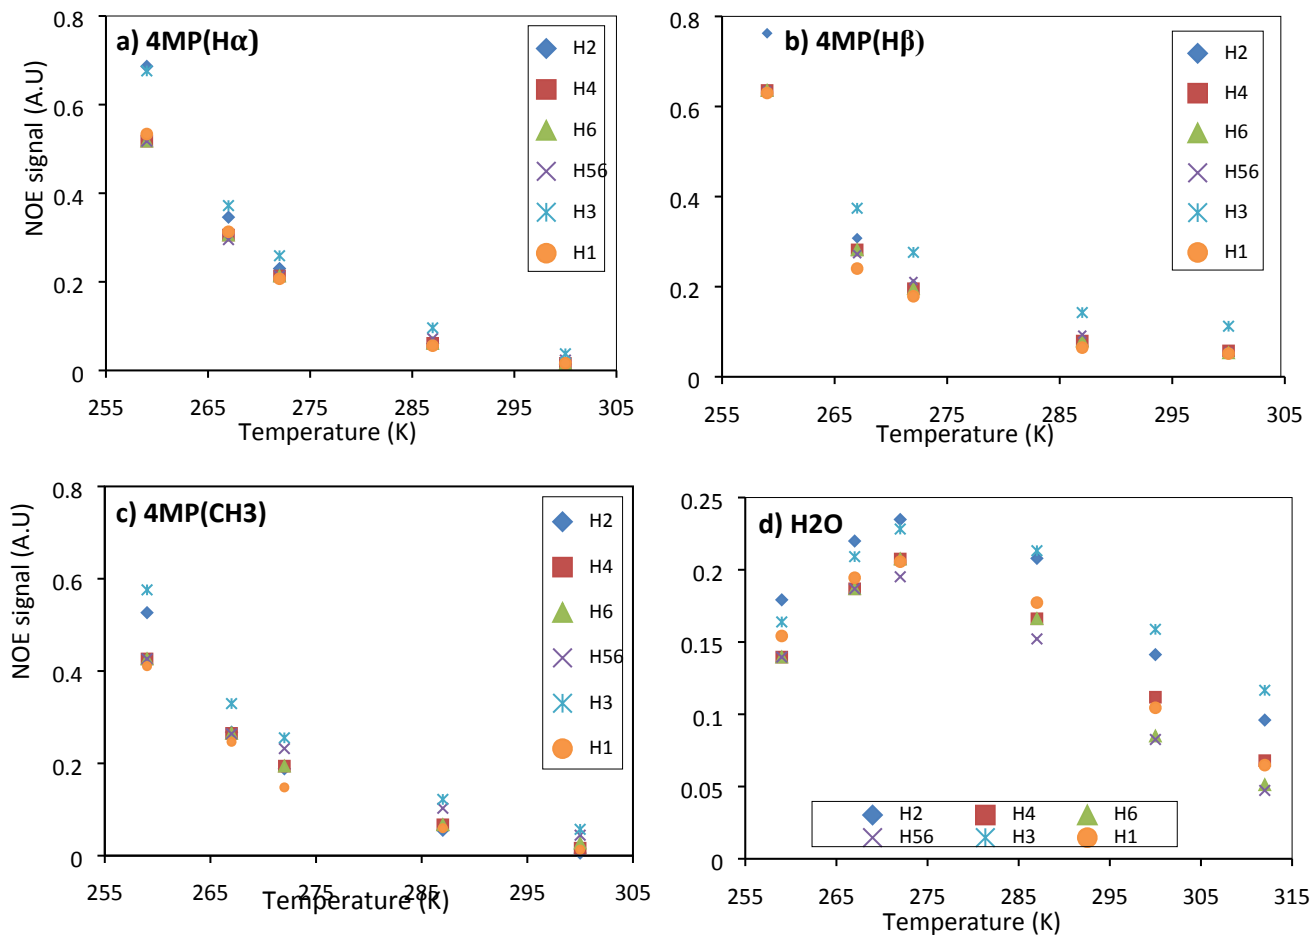

**Figure S3:** Relative integration of NOE signals vs. temperature of (a) 4MP(H $\alpha$ ), (b) 4MP(H $\beta$ ), (c) 4MP(CH $_3$ ) and (d) H $_2$ O with  $\alpha$ CD(H $_1$ -H $_6$ ) for host-guest investigation in  $\alpha$ CD-4MP-H $_2$ O mixture.

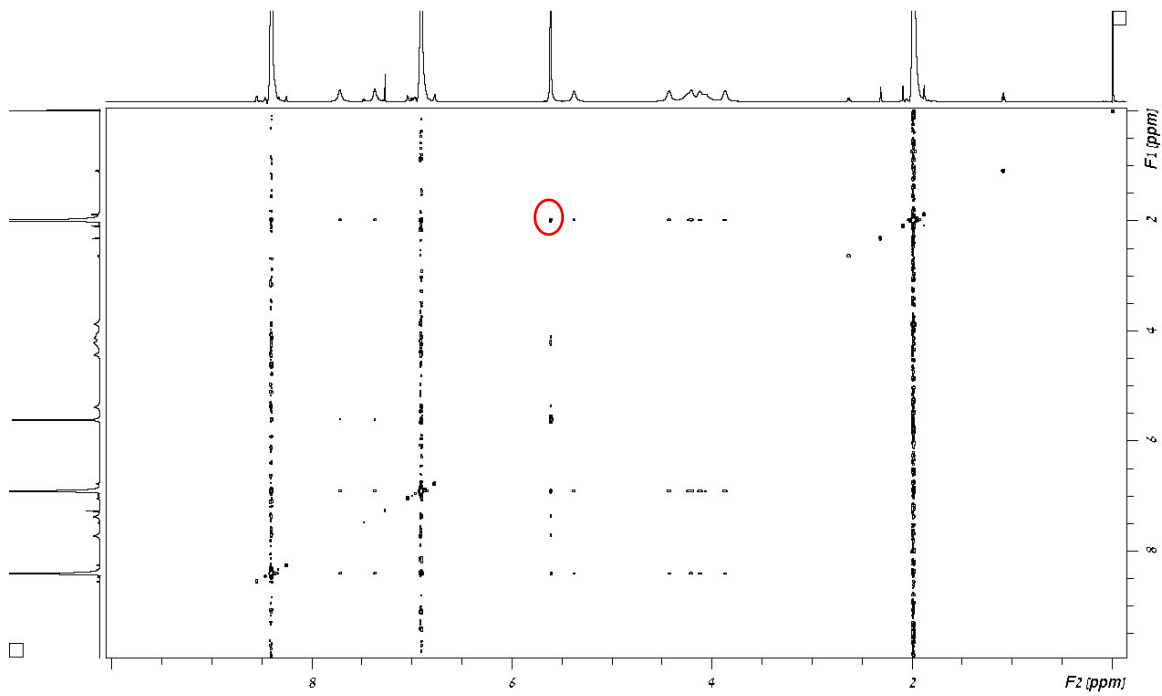

**Figure S4:** 2D-NOESY spectra of  $\alpha$ CD·4MP·H<sub>2</sub>O mixture at 259K. 4MP(CH<sub>3</sub>)-H<sub>2</sub>O cross peak is signed.

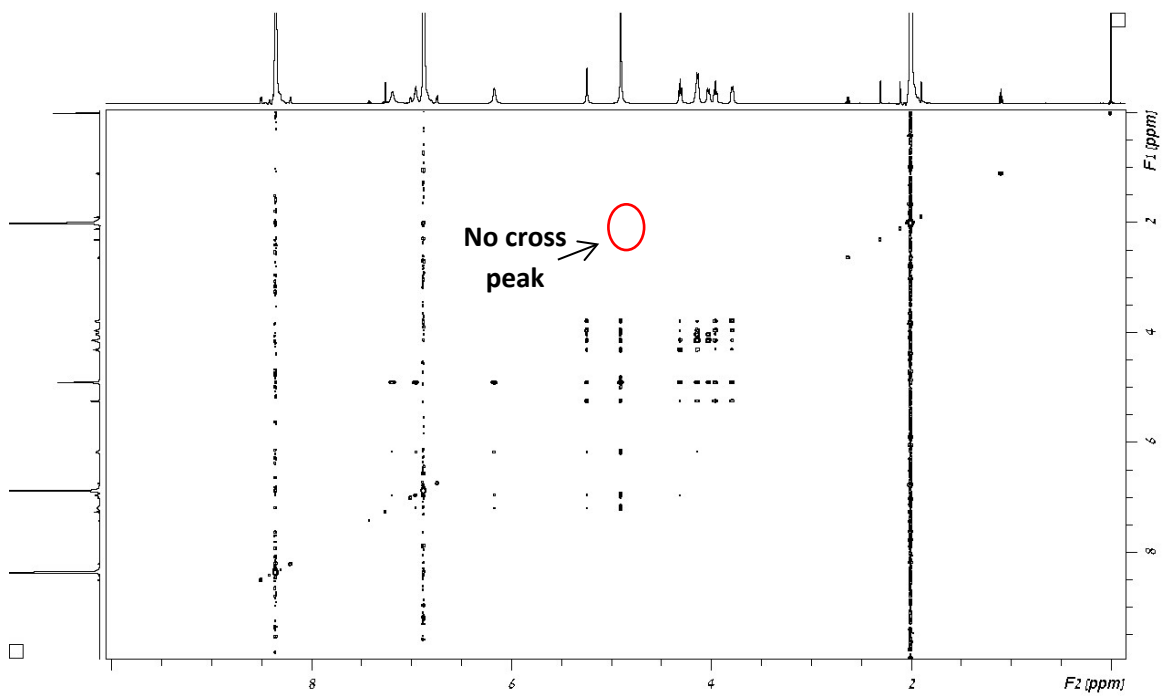

**Figure S5:** 2D-NOESY spectra of  $\alpha$ CD·4MP·H<sub>2</sub>O mixture at 300K, with no 4MP(CH<sub>3</sub>)-H<sub>2</sub>O cross peak.

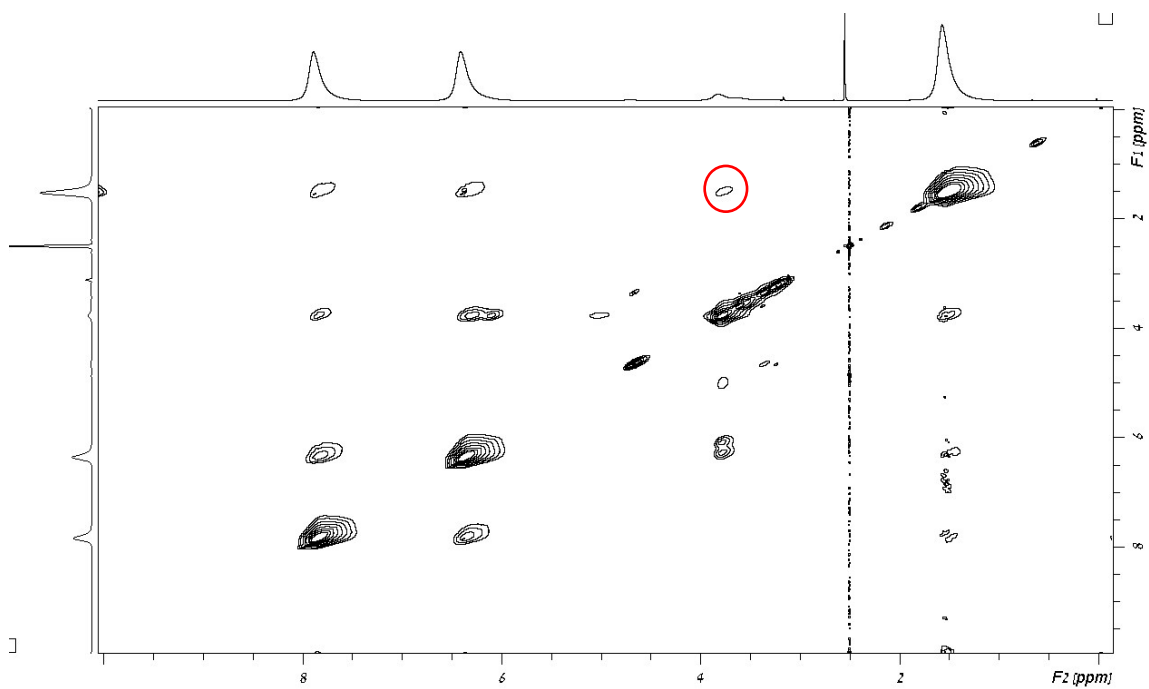

**Figure S6:** 2D-NOESY spectra of  $\alpha$ CD-4MP-H<sub>2</sub>O mixture at 335K. 4MP(CH<sub>3</sub>)-H<sub>2</sub>O cross peak is signed.

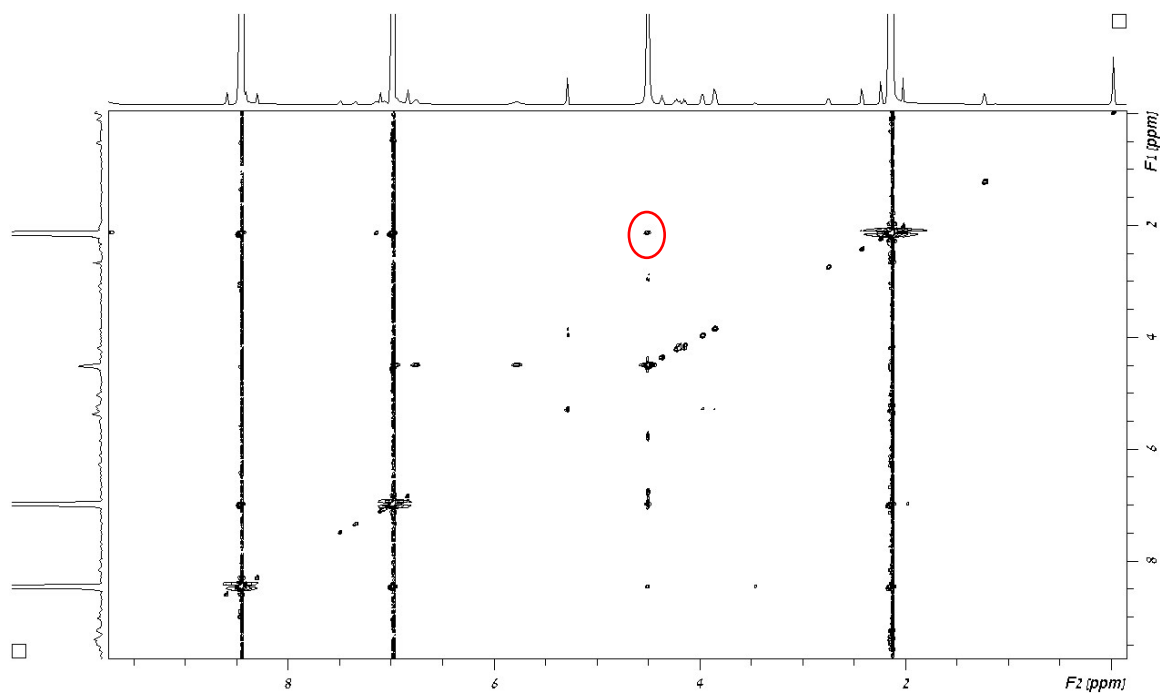

**Figure S7:** HRMAS 2D-NOESY spectra of  $\alpha$ CD-4MP-H<sub>2</sub>O mixture at 335K. 4MP(CH<sub>3</sub>)-H<sub>2</sub>O cross peak is signed.

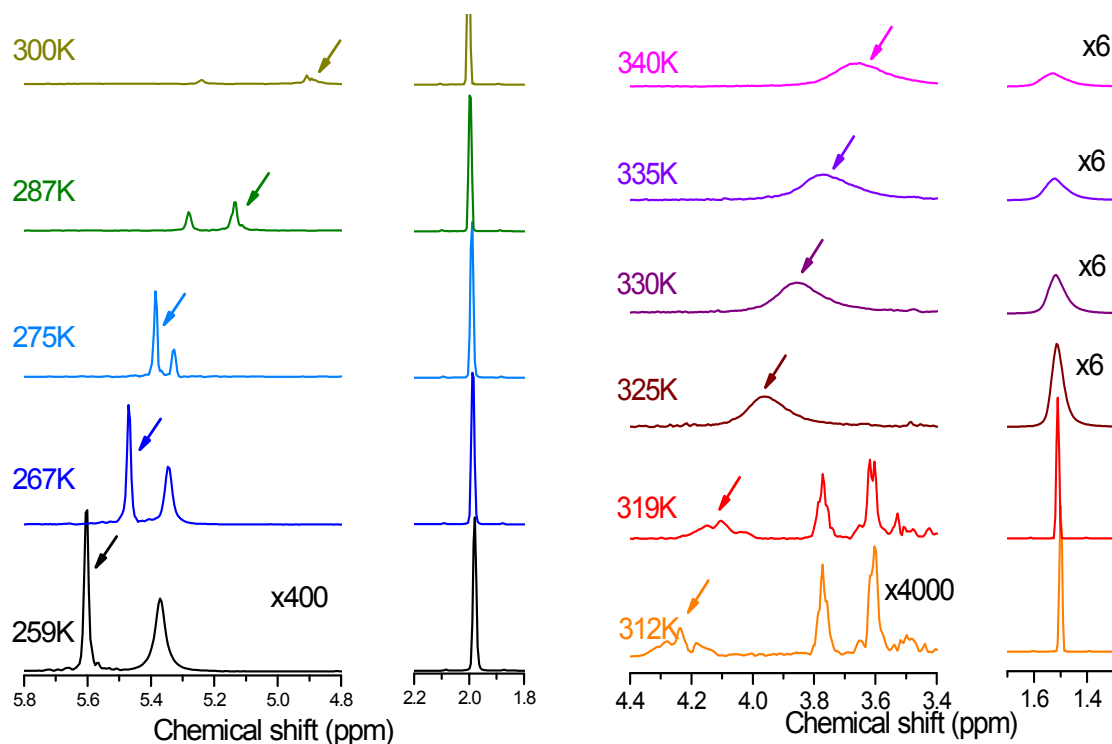

**Figure S8:** 1D-NOE spectra focused on  $4MP(CH_3) \rightarrow H_2O$  cross peak in  $\alpha CD \cdot 4MP \cdot H_2O$  mixture at different temperatures (projected from 2D-NOESY spectra,  $4MP(CH_3)$  is excited).  $4MP(CH_3)$  peak is at 1.5-2.0 ppm and its cross peak with water is sigthed with an arrow. These cross peak were integrated and their normalized values at different temperature are shown in Figure 3 in the main article.

**Table S1:** Spin lattice relaxation time ( $T_1$ ) values (in seconds) for the protons in  $\alpha CD \cdot 4MP \cdot H_2O$  mixture.

| Temperature | $4MP(CH_3)$              | DMSO | $H_2$ | $H_4$ | $H_6$ | $H_{5,6}$ | $H_3$ | $H_2O$ | $H_1$ | $4MP(H_\beta)$ | $4MP(H_\alpha)$ |
|-------------|--------------------------|------|-------|-------|-------|-----------|-------|--------|-------|----------------|-----------------|
| 293K        | 3.22 (0.14) <sup>a</sup> | 2.3  | 1.03  | 1.04  | 1.03  | 1.03      | 1.03  | 1.03   | 1.02  | 4.84           | 4.43            |
| 312K        | 4.19 (0.15) <sup>a</sup> | 3.6  | 1.03  | 1.03  | 1.02  | 1.03      | 1.03  | 1.03   | 1.03  | 5.85           | 5.94            |

<sup>a</sup> Long and (short) relaxation time due to bi-exponential fitting.

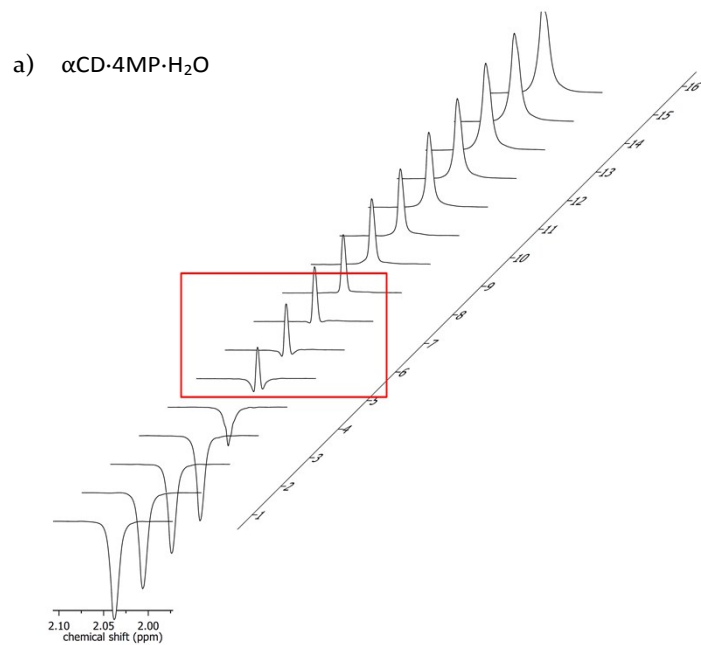

b) 6:1 4MP-H<sub>2</sub>O

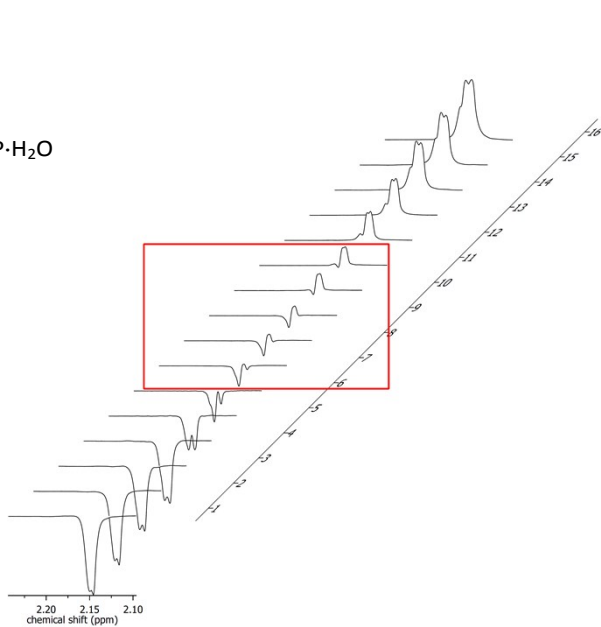

c) 4MP (with residual water)

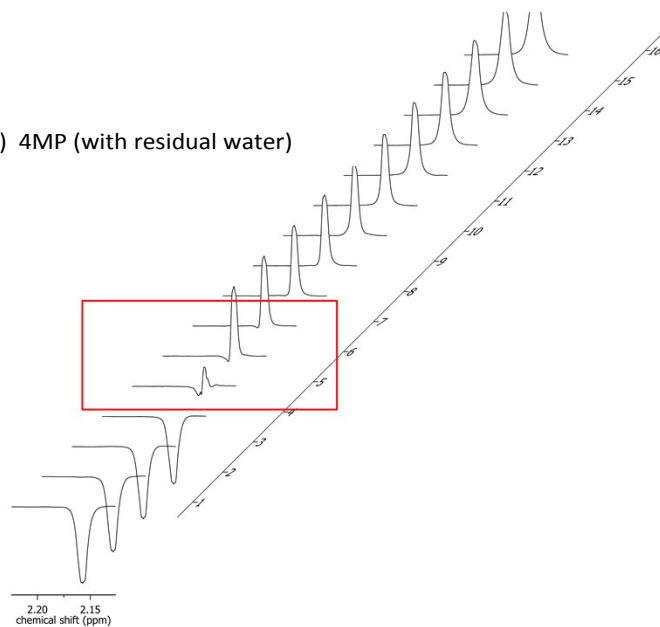

**Figure S9:** Inverse-recovery measurements of 4MP(CH<sub>3</sub>) in a)  $\alpha$ CD-4MP-H<sub>2</sub>O, b) 6:1 4MP-H<sub>2</sub>O and c) 4MP at 278±3K. Several populations with different relaxation times are clearly shown and signed.

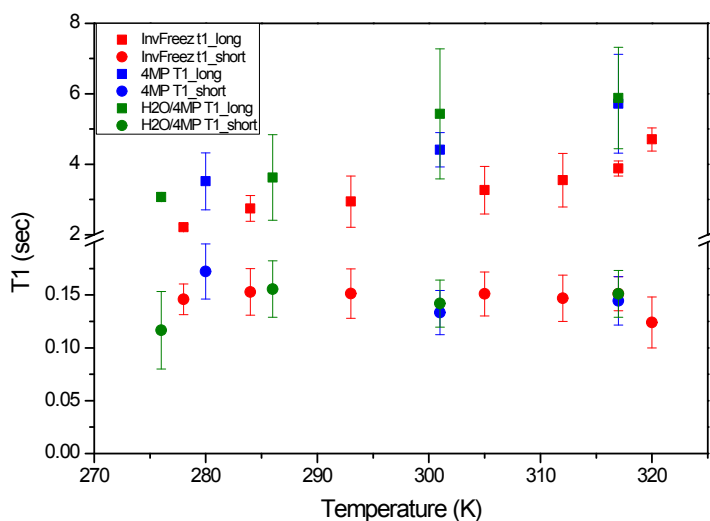

**Figure S10:** Temperature dependence of 4MP(CH<sub>3</sub>) long (square) and short (circle) T<sub>1</sub> values of αCD·4MP·H<sub>2</sub>O (red), 6:1 4MP·H<sub>2</sub>O (green) and 4MP (blue). Error bars represent errors in fitting bi-exponential curves to data.

T<sub>1</sub> analysis of a peak with several populations was done by fitting the inverse recovery integration points

to  $Mz = \sum_{i=1}^n M_{0,i} (1 - 2\exp(-t/T_{1,i}))$ . We found that bi-exponential fitting

$Mz = M_{0,long} [1 - 2\exp(-t/T_{1,long})] + M_{0,short} [1 - 2\exp(-t/T_{1,short})]$  is sufficient, meaning that the 4MP(CH<sub>3</sub>) populations could be divided to two main groups: with long and short relaxation times.

## SI REFERENCES

---

<sup>i</sup> F. B. T. Pessine, A. Calderini and G. L. Alexandrino, in Book: *Magnetic Resonance Spectroscopy*, ed. D-H. Kim, InTech, Shanghai, 2012, 12, p. 237.
